# Supplementary material for: Transfer Patterns of Very Low Birth Weight Infants for Convalescent Care
Source: Oxford University Press journal article supplement (doi:10.1542/peds.2021-054866), 2022-05-19
Supplement: peds_2021054866supplementarydata.pdf [file peds_2021054866supplementarydata.pdf]

## Supplemental Information

**SUPPLEMENTAL TABLE 6** Participating Centers

| Hospital Name                                                                         | City            | State      |
|---------------------------------------------------------------------------------------|-----------------|------------|
| Ascension St. Vincent's Birmingham                                                    | Birmingham      | Alabama    |
| Brookwood Medical Center                                                              | Birmingham      | Alabama    |
| University of Alabama at Birmingham                                                   | Birmingham      | Alabama    |
| Huntsville Hospital                                                                   | Huntsville      | Alabama    |
| USA Children's and Women's Hospital                                                   | Mobile          | Alabama    |
| Baptist Medical Center East                                                           | Montgomery      | Alabama    |
| Baptist Medical Center South                                                          | Montgomery      | Alabama    |
| Children's Hospital at Providence, Alaska, The                                        | Anchorage       | Alaska     |
| Flagstaff Medical Center                                                              | Flagstaff       | Arizona    |
| Abrazo Arrowhead Campus                                                               | Glendale        | Arizona    |
| Banner Children's at Thunderbird                                                      | Glendale        | Arizona    |
| Banner Children's at Desert                                                           | Mesa            | Arizona    |
| Arizona Children's Center Maricopa Integrated Health                                  | Phoenix         | Arizona    |
| Banner Estrella Medical Center                                                        | Phoenix         | Arizona    |
| Banner University Medical Center Phoenix                                              | Phoenix         | Arizona    |
| Phoenix Children's Hospital                                                           | Phoenix         | Arizona    |
| St. Joseph's Hospital and Medical Center                                              | Phoenix         | Arizona    |
| HonorHealth Scottsdale Shea Medical Center                                            | Scottsdale      | Arizona    |
| Banner University Medical Center - Tucson                                             | Tucson          | Arizona    |
| Washington Regional Medical Center                                                    | Fayetteville    | Arkansas   |
| Mercy Hospital Fort Smith                                                             | Fort Smith      | Arkansas   |
| Willow Creek Women's Hospital - NICU                                                  | Johnson         | Arkansas   |
| St. Bernards Medical Center                                                           | Jonesboro       | Arkansas   |
| Arkansas Children's Hospital                                                          | Little Rock     | Arkansas   |
| University of Arkansas for Medical Sciences                                           | Little Rock     | Arkansas   |
| Mercy Hospital Northwest Arkansas                                                     | Rogers          | Arkansas   |
| Anaheim Regional Medical Center                                                       | Anaheim         | California |
| Kaiser Foundation Hospital (KFH) Orange County - Anaheim                              | Anaheim         | California |
| St. Mary Medical Center - Apple Valley                                                | Apple Valley    | California |
| Methodist Hospital of Southern California                                             | Arcadia         | California |
| Adventist Health Bakersfield                                                          | Bakersfield     | California |
| Bakersfield Memorial Hospital                                                         | Bakersfield     | California |
| Kern Medical Center                                                                   | Bakersfield     | California |
| Mercy Southwest Hospital                                                              | Bakersfield     | California |
| KFH Baldwin Park                                                                      | Baldwin Park    | California |
| KFH Bellflower                                                                        | Bellflower      | California |
| Alta Bates Summit Medical Center                                                      | Berkeley        | California |
| Providence St. Joseph Medical Center                                                  | Burbank         | California |
| Mercy San Juan Medical Center                                                         | Carmichael      | California |
| Rady Children's at Scripps Mercy Chula Vista                                          | Chula Vista     | California |
| Scripps Mercy Hospital Chula Vista                                                    | Chula Vista     | California |
| Sharp Chula Vista Medical Center                                                      | Chula Vista     | California |
| Clovis Community Medical Center                                                       | Clovis          | California |
| Arrowhead Regional Medical Center                                                     | Colton          | California |
| Downey Regional Medical Center                                                        | Downey          | California |
| KFH Downey                                                                            | Downey          | California |
| El Centro Regional Medical Center                                                     | El Centro       | California |
| Rady Children's at Scripps Encinitas Memorial Hosp                                    | Encinitas       | California |
| Rady Children's at Palomar Medical Center Escondido                                   | Escondido       | California |
| Northbay Medical Center                                                               | Fairfield       | California |
| KFH Fontana                                                                           | Fontana         | California |
| Fountain Valley Regional Hospital & Medical Center                                    | Fountain Valley | California |
| Lucile Packard Children's Hospital (LPCH) Special Care Nursery at Washington Hospital | Fremont         | California |
| Washington Hospital - Fremont                                                         | Fremont         | California |
| San Joaquin General Hospital (SJGH)                                                   | French Camp     | California |
| Community Regional Medical Center - Fresno                                            | Fresno          | California |

**SUPPLEMENTAL TABLE 6** Continued

| Hospital Name                                          | City          | State      |
|--------------------------------------------------------|---------------|------------|
| Valley Children's Hospital at St. Agnes Medical Center | Fresno        | California |
| St. Jude Medical Center                                | Fullerton     | California |
| Adventist Health - Glendale                            | Glendale      | California |
| Glendale Memorial Hospital and Health Center           | Glendale      | California |
| Marin Health Medical Center                            | Greenbrae     | California |
| KFH South Bay                                          | Harbor City   | California |
| Centinela Hospital Medical Center                      | Inglewood     | California |
| KFH Orange County - Irvine                             | Irvine        | California |
| Rady Children's at Scripps La Jolla                    | La Jolla      | California |
| UCSD Health La Jolla - Jacobs Medical Center           | La Jolla      | California |
| Grossmont Hospital, Women's Health Center              | La Mesa       | California |
| MemorialCare Saddleback Medical Center                 | Laguna Hills  | California |
| Antelope Valley Hospital                               | Lancaster     | California |
| Loma Linda University Children's Hospital              | Loma Linda    | California |
| MemorialCare Miller Children's & Women's Hospital      | Long Beach    | California |
| St. Mary Medical Center                                | Long Beach    | California |
| Adventist Health - White Memorial                      | Los Angeles   | California |
| California Hospital Medical Center - Los Angeles       | Los Angeles   | California |
| Cedars-Sinai Medical Center (CSMC)                     | Los Angeles   | California |
| Children's Hospital Los Angeles (CHLA)                 | Los Angeles   | California |
| Hollywood Presbyterian Medical Center                  | Los Angeles   | California |
| KFH Los Angeles                                        | Los Angeles   | California |
| KFH West Los Angeles                                   | Los Angeles   | California |
| King Drew Medical Center                               | Los Angeles   | California |
| LAC/USC Medical Center                                 | Los Angeles   | California |
| PIH Health Good Samaritan Hospital                     | Los Angeles   | California |
| UCLA Mattel Children's Hospital                        | Los Angeles   | California |
| St. Francis Medical Center                             | Lynwood       | California |
| Valley Children's Hospital                             | Madera        | California |
| Adventist Health and Rideout                           | Marysville    | California |
| Providence Holy Cross Medical Center                   | Mission Hills | California |
| CHOC Children's at Mission Hospital                    | Mission Viejo | California |
| Doctors Medical Center of Modesto                      | Modesto       | California |
| KFH Modesto                                            | Modesto       | California |
| Memorial Medical Center - Modesto                      | Modesto       | California |
| Garfield Medical Center                                | Monterey Park | California |
| KFH Moreno Valley                                      | Moreno Valley | California |
| Riverside University Health System Medical Center      | Moreno Valley | California |
| El Camino Hospital                                     | Mountain View | California |
| Rady Children's at Rancho Springs Medical Center       | Murrieta      | California |
| Paradise Valley Hospital                               | National City | California |
| Hoag Memorial Hospital, Presbyterian                   | Newport Beach | California |
| Northridge Hospital Medical Center                     | Northridge    | California |
| KFH Oakland                                            | Oakland       | California |
| UCSF Benioff Children's Hospital - Oakland             | Oakland       | California |
| Tri-City Medical Center                                | Oceanside     | California |
| KFH Ontario Campus                                     | Ontario       | California |
| CHOC Children's Hospital                               | Orange        | California |
| UC Irvine Medical Center                               | Orange        | California |
| St. John's Regional Medical Center                     | Oxnard        | California |
| Desert Regional Medical Center                         | Palm Springs  | California |
| Lucile Packard Children's Hospital Stanford            | Palo Alto     | California |
| KFH Panorama City                                      | Panorama City | California |
| Huntington Memorial Hospital                           | Pasadena      | California |
| Pomona Valley Hospital Medical Center                  | Pomona        | California |
| Mercy Medical Center - Redding                         | Redding       | California |
| Redlands Community Hospital                            | Redlands      | California |
| LPCH Special Care Nursery at Sequoia Hospital          | Redwood City  | California |
| AHMC Parkview Community Medical Center                 | Riverside     | California |
| KFH Riverside                                          | Riverside     | California |

**SUPPLEMENTAL TABLE 6** Continued

| Hospital Name                                               | City            | State      |
|-------------------------------------------------------------|-----------------|------------|
| Riverside Community Hospital                                | Riverside       | California |
| KFH Roseville                                               | Roseville       | California |
| Sutter Roseville Medical Center                             | Roseville       | California |
| Anderson Lucchetti Women's and Children's Center            | Sacramento      | California |
| Kaiser Permanente Sacramento                                | Sacramento      | California |
| Methodist Hospital of Sacramento                            | Sacramento      | California |
| UC Davis Medical Center                                     | Sacramento      | California |
| Natividad Medical Center                                    | Salinas         | California |
| Salinas Valley Memorial Hospital                            | Salinas         | California |
| Community Hospital of San Bernardino                        | San Bernardino  | California |
| St. Bernardine Medical Center                               | San Bernardino  | California |
| KFH San Diego                                               | San Diego       | California |
| Naval Medical Center San Diego                              | San Diego       | California |
| Rady Children's at Scripps Mercy Hospital San Diego         | San Diego       | California |
| Rady Children's Hospital San Diego (RCHSD)                  | San Diego       | California |
| Scripps Mercy Hospital San Diego                            | San Diego       | California |
| Sharp Mary Birch Hospital for Women and Newborns            | San Diego       | California |
| UCSD Medical Center - Hillcrest                             | San Diego       | California |
| California Pacific Medical Center Van Ness Campus           | San Francisco   | California |
| KFH San Francisco                                           | San Francisco   | California |
| UCSF Benioff Children's Hospital in San Francisco           | San Francisco   | California |
| Zuckerberg San Francisco General Hospital and Trauma Center | San Francisco   | California |
| San Gabriel Valley Medical Center                           | San Gabriel     | California |
| Good Samaritan Hospital, San Jose                           | San Jose        | California |
| O'Connor Hospital - San Jose                                | San Jose        | California |
| Regional Medical Center of San Jose                         | San Jose        | California |
| Santa Clara Valley Medical Center (SCVMC)                   | San Jose        | California |
| KFH San Leandro                                             | San Leandro     | California |
| Sierra Vista Regional Medical Center                        | San Luis Obispo | California |
| Orange County Global Medical Center                         | Santa Ana       | California |
| Santa Barbara Cottage Hospital                              | Santa Barbara   | California |
| KFH Santa Clara                                             | Santa Clara     | California |
| Dignity Health Dominican Hospital                           | Santa Cruz      | California |
| Marian Regional Medical Center                              | Santa Maria     | California |
| Providence St. John's Health Center                         | Santa Monica    | California |
| Santa Monica - UCLA Medical Center & Orthopaedic Hospital   | Santa Monica    | California |
| Santa Rosa Memorial Hospital                                | Santa Rosa      | California |
| Sutter Santa Rosa Regional Hospital                         | Santa Rosa      | California |
| Dameron Hospital Association                                | Stockton        | California |
| St. Joseph's Medical Center - Stockton                      | Stockton        | California |
| LAC/Olive View - UCLA Medical Center                        | Sylmar          | California |
| Providence Cedars-Sinai Tarzana Medical Center              | Tarzana         | California |
| Los Robles Regional Hospital & Medical Center               | Thousand Oaks   | California |
| LAC/Harbor - UCLA Medical Center                            | Torrance        | California |
| Providence Little Company of Mary Medical Center            | Torrance        | California |
| Torrance Memorial Medical Center                            | Torrance        | California |
| Adventist Health Ukiah Valley                               | Ukiah           | California |
| San Antonio Regional Hospital                               | Upland          | California |
| Henry Mayo Newhall Memorial Hospital                        | Valencia        | California |
| Valley Presbyterian Hospital                                | Van Nuys        | California |
| Community Memorial Hospital of Ventura                      | Ventura         | California |
| Ventura County Medical Center (VCMC)                        | Ventura         | California |
| Kaweah Delta Healthcare District                            | Visalia         | California |
| John Muir Health, Walnut Creek Medical Center               | Walnut Creek    | California |
| KFH Walnut Creek                                            | Walnut Creek    | California |
| Watsonville Community Hospital                              | Watsonville     | California |
| Emanate Health - Queen of the Valley Hospital               | West Covina     | California |
| Presbyterian Intercommunity Hospital (PIH Health)           | Whittier        | California |
| KFH Woodland Hills                                          | Woodland Hills  | California |
| Children's Hospital Colorado                                | Aurora          | Colorado   |

**SUPPLEMENTAL TABLE 6** Continued

| Hospital Name                                                      | City              | State                |
|--------------------------------------------------------------------|-------------------|----------------------|
| Medical Center of Aurora                                           | Aurora            | Colorado             |
| UCHSC                                                              | Aurora            | Colorado             |
| St. Francis Medical Center                                         | Colorado Springs  | Colorado             |
| Denver Health Medical Center                                       | Denver            | Colorado             |
| Rocky Mountain Hospital for Children at P/SL                       | Denver            | Colorado             |
| Rose Medical Center                                                | Denver            | Colorado             |
| Saint Joseph Hospital                                              | Denver            | Colorado             |
| Swedish Medical Center                                             | Englewood         | Colorado             |
| Poudre Valley Hospital                                             | Fort Collins      | Colorado             |
| St. Mary's Hospital and Medical Center                             | Grand Junction    | Colorado             |
| Banner Health Northern Colorado Medical Center                     | Greeley           | Colorado             |
| Good Samaritan Medical Center                                      | Lafayette         | Colorado             |
| Sky Ridge Medical Center                                           | Lone Tree         | Colorado             |
| Medical Center of the Rockies                                      | Loveland          | Colorado             |
| Yale-New Haven Children's at Bridgeport Hospital                   | Bridgeport        | Connecticut          |
| Danbury Hospital                                                   | Danbury           | Connecticut          |
| Connecticut Children's NICU at UCONN Health Center                 | Farmington        | Connecticut          |
| Greenwich Hospital                                                 | Greenwich         | Connecticut          |
| Connecticut Children's Medical Center                              | Hartford          | Connecticut          |
| St. Francis Hospital                                               | Hartford          | Connecticut          |
| Hospital of Central Connecticut, The                               | New Britain       | Connecticut          |
| Yale-New Haven Children's Hospital                                 | New Haven         | Connecticut          |
| Norwalk Hospital                                                   | Norwalk           | Connecticut          |
| Stamford Hospital                                                  | Stamford          | Connecticut          |
| ChristianaCare                                                     | Newark            | Delaware             |
| MedStar Georgetown University Hospital                             | Washington        | District Of Columbia |
| Washington Hospital Center                                         | Washington        | District Of Columbia |
| West Boca Medical Center                                           | Boca Raton        | Florida              |
| Brandon Regional Hospital                                          | Brandon           | Florida              |
| Halifax Medical Center                                             | Daytona Beach     | Florida              |
| Broward Health Medical Center/Salah Foundation Children's Hospital | Fort Lauderdale   | Florida              |
| Golisano Children's Hospital of Southwest Florida                  | Fort Myers        | Florida              |
| Lawnwood Regional Medical Center & Heart Institute                 | Fort Pierce       | Florida              |
| North Florida Regional Medical Center, Inc.                        | Gainesville       | Florida              |
| University of Florida Shands Hospital Gainesville                  | Gainesville       | Florida              |
| Joe DiMaggio Children's Hospital                                   | Hollywood         | Florida              |
| University of Florida Health Jacksonville                          | Jacksonville      | Florida              |
| Wolfson Children's Hospital                                        | Jacksonville      | Florida              |
| Osceola Regional Medical Center                                    | Kissimmee         | Florida              |
| Lakeland Regional Health Medical Center                            | Lakeland          | Florida              |
| Northwest Medical Center                                           | Margate           | Florida              |
| Baptist Children's Hospital                                        | Miami             | Florida              |
| Jackson Memorial Hospital                                          | Miami             | Florida              |
| Kendall Regional Medical Center                                    | Miami             | Florida              |
| Mercy Hospital                                                     | Miami             | Florida              |
| Nicklaus Children's Hospital                                       | Miami             | Florida              |
| Jackson North Medical Center                                       | North Miami Beach | Florida              |
| Orange Park Medical Center                                         | Orange Park       | Florida              |
| AdventHealth for Children                                          | Orlando           | Florida              |
| Nemours Children's Hospital                                        | Orlando           | Florida              |
| Winnie Palmer Hospital for Women and Babies                        | Orlando           | Florida              |
| Gulf Coast Regional Medical Center                                 | Panama City       | Florida              |
| Studer Family Children's Hospital at Ascension Sac                 | Pensacola         | Florida              |
| Plantation General Hospital                                        | Plantation        | Florida              |
| Bayfront Health Port Charlotte                                     | Port Charlotte    | Florida              |
| Morton Plant Mease Hospital                                        | Safety Harbor     | Florida              |
| Johns Hopkins All Children's Hospital                              | Saint Petersburg  | Florida              |
| All Children's at Sarasota Memorial                                | Sarasota          | Florida              |
| Tallahassee Memorial Hospital                                      | Tallahassee       | Florida              |
| St. Joseph's Children's Hospital                                   | Tampa             | Florida              |

**SUPPLEMENTAL TABLE 6** Continued

| Hospital Name                                 | City              | State    |
|-----------------------------------------------|-------------------|----------|
| Tampa General Hospital                        | Tampa             | Florida  |
| Women's Center - Advent Health Tampa          | Tampa             | Florida  |
| Wellington Regional Medical Center            | Wellington        | Florida  |
| St. Mary's Hospital                           | West Palm Beach   | Florida  |
| Phoebe Putney Memorial Hospital               | Albany            | Georgia  |
| Piedmont Athens Regional                      | Athens            | Georgia  |
| Emory University Hospital, Midtown            | Atlanta           | Georgia  |
| Grady Memorial Hospital                       | Atlanta           | Georgia  |
| Northside Hospital                            | Atlanta           | Georgia  |
| Piedmont Hospital                             | Atlanta           | Georgia  |
| Augusta University Health System              | Augusta           | Georgia  |
| Wellstar Cobb Hospital                        | Austell           | Georgia  |
| Northside Hospital Cherokee                   | Canton            | Georgia  |
| Medical Center at Columbus Regional, The      | Columbus          | Georgia  |
| Piedmont Rockdale Hospital                    | Conyers           | Georgia  |
| Northside Hospital Forsyth                    | Cumming           | Georgia  |
| Hamilton Medical Center                       | Dalton            | Georgia  |
| WellStar Atlanta Medical Center South         | East Point        | Georgia  |
| Piedmont Fayette Hospital                     | Fayetteville      | Georgia  |
| Northeast Georgia Medical Center              | Gainesville       | Georgia  |
| Emory Johns Creek Hospital                    | Johns Creek       | Georgia  |
| Gwinnett Hospital System                      | Lawrenceville     | Georgia  |
| Coliseum Medical Center                       | Macon             | Georgia  |
| Wellstar Kennestone Hospital                  | Marietta          | Georgia  |
| Southern Regional Medical Center              | Riverdale         | Georgia  |
| Floyd Medical Center                          | Rome              | Georgia  |
| Memorial Health Savannah                      | Savannah          | Georgia  |
| St. Joseph's/Candler Health System            | Savannah          | Georgia  |
| Eastside Medical Center                       | Snellville        | Georgia  |
| Piedmont Henry Hospital                       | Stockbridge       | Georgia  |
| Kaiser Permanente Moanalua Medical Center     | Honolulu          | Hawaii   |
| Kapiolani Medical Center for Women & Children | Honolulu          | Hawaii   |
| St. Luke's Regional Medical Center            | Boise             | Idaho    |
| Kootenai Health                               | Coeur d'Alene     | Idaho    |
| Eastern Idaho Regional Medical Center (EIRMC) | Idaho Falls       | Idaho    |
| St. Luke's Meridian Medical Center            | Meridian          | Idaho    |
| St. Luke's Nampa Medical Center               | Nampa             | Idaho    |
| Portneuf Medical Center                       | Pocatello         | Idaho    |
| St. Luke's Magic Valley                       | Twin Falls        | Idaho    |
| Northwest Community Healthcare                | Arlington Heights | Illinois |
| Rush Copley Medical Center                    | Aurora            | Illinois |
| Memorial Hospital                             | Belleville        | Illinois |
| Memorial Hospital of Carbondale               | Carbondale        | Illinois |
| Advocate Illinois Masonic Medical Center      | Chicago           | Illinois |
| John H. Stroger, Jr. Hospital of Cook County  | Chicago           | Illinois |
| Mercy Hospital and Medical Center             | Chicago           | Illinois |
| Mt. Sinai Hospital Medical Center             | Chicago           | Illinois |
| Northwestern Memorial                         | Chicago           | Illinois |
| Rush University Medical Center                | Chicago           | Illinois |
| St. Joseph Hospital Chicago                   | Chicago           | Illinois |
| University of Chicago                         | Chicago           | Illinois |
| University of Illinois at Chicago             | Chicago           | Illinois |
| Advocate Good Samaritan Hospital              | Downers Grove     | Illinois |
| Elmhurst Hospital                             | Elmhurst          | Illinois |
| Evanston Hospital                             | Evanston          | Illinois |
| Adventist Hinsdale Hospital                   | Hinsdale          | Illinois |
| St. Alexius Medical Center                    | Hoffman Estates   | Illinois |
| Northwestern Medicine - Huntley Hospital      | Huntley           | Illinois |
| Amita Health St. Joseph Medical Center        | Joliet            | Illinois |
| RMCH at Loyola University Medical Center      | Maywood           | Illinois |

**SUPPLEMENTAL TABLE 6** Continued

| Hospital Name                                                     | City            | State    |
|-------------------------------------------------------------------|-----------------|----------|
| Centegra Hospital-McHenry                                         | McHenry         | Illinois |
| UnityPoint Trinity-Moline                                         | Moline          | Illinois |
| Edward Hospital and Health Services                               | Naperville      | Illinois |
| Advocate Children's Hospital - Oak Lawn                           | Oak Lawn        | Illinois |
| Advocate Children's Hospital - Park Ridge                         | Park Ridge      | Illinois |
| Children's Hospital of Illinois at OSF St. Francis Medical Center | Peoria          | Illinois |
| UnityPoint Health-Methodist Hospital                              | Peoria          | Illinois |
| Javon Bea Hospital - Riverside                                    | Rockford        | Illinois |
| SwedishAmerican Hospital                                          | Rockford        | Illinois |
| St. John's Hospital                                               | Springfield     | Illinois |
| Carle Foundation Hospital                                         | Urbana          | Illinois |
| Central DuPage Hospital                                           | Winfield        | Illinois |
| Ascension St. Vincent Carmel                                      | Carmel          | Indiana  |
| Indiana University Health North Hospital                          | Carmel          | Indiana  |
| Franciscan Health Crown Point                                     | Crown Point     | Indiana  |
| Ascension St. Vincent Evansville                                  | Evansville      | Indiana  |
| Dupont Hospital                                                   | Fort Wayne      | Indiana  |
| Lutheran Hospital of Indiana                                      | Fort Wayne      | Indiana  |
| Parkview Women's and Children's Hospital                          | Fort Wayne      | Indiana  |
| St. Joseph Hospital                                               | Fort Wayne      | Indiana  |
| Methodist Hospitals Northlake Campus                              | Gary            | Indiana  |
| Ascension St. Vincent Hospital - Women's                          | Indianapolis    | Indiana  |
| Community Hospital North Indianapolis                             | Indianapolis    | Indiana  |
| Franciscan St. Francis Health                                     | Indianapolis    | Indiana  |
| Methodist Hospital of Indiana                                     | Indianapolis    | Indiana  |
| Riley Hospital for Children at Indiana University Health          | Indianapolis    | Indiana  |
| Wishard Memorial Hospital                                         | Indianapolis    | Indiana  |
| Clark Memorial Health                                             | Jeffersonville  | Indiana  |
| Franciscan Health Lafayette                                       | Lafayette       | Indiana  |
| Saint Joseph Regional Medical Center                              | Mishawaka       | Indiana  |
| Ball Memorial Hospital                                            | Muncie          | Indiana  |
| Community Hospital                                                | Munster         | Indiana  |
| Women's Hospital                                                  | Newburgh        | Indiana  |
| Memorial Hospital                                                 | South Bend      | Indiana  |
| Union Hospital                                                    | Terre Haute     | Indiana  |
| UnityPoint Trinity-Bettendorf Neonatal Specialty Care Unit        | Bettendorf      | Iowa     |
| Mercy Medical Center Cedar Rapids                                 | Cedar Rapids    | Iowa     |
| St. Luke's Hospital                                               | Cedar Rapids    | Iowa     |
| Genesis Medical Center                                            | Davenport       | Iowa     |
| Blank Children's Hospital                                         | Des Moines      | Iowa     |
| Mercy Medical Center                                              | Des Moines      | Iowa     |
| University of Iowa Children's Hospital                            | Iowa City       | Iowa     |
| St. Luke's Regional Medical Center                                | Sioux City      | Iowa     |
| Covenant Medical Center                                           | Waterloo        | Iowa     |
| University of Kansas Hospital Authority                           | Kansas City     | Kansas   |
| Overland Park Regional Medical Center                             | Overland Park   | Kansas   |
| Shawnee Mission Medical Center                                    | Shawnee Mission | Kansas   |
| Ascension Via Christi Hospital                                    | Wichita         | Kansas   |
| Wesley Medical Center                                             | Wichita         | Kansas   |
| King's Daughters Medical Center                                   | Ashland         | Kentucky |
| Medical Center NICU Bowling Green, The                            | Bowling Green   | Kentucky |
| St. Elizabeth Healthcare                                          | Edgewood        | Kentucky |
| Hardin Memorial Hospital                                          | Elizabethtown   | Kentucky |
| Frankfort Regional Medical Center                                 | Frankfort       | Kentucky |
| Deaconess Henderson Hospital                                      | Henderson       | Kentucky |
| Jennie Stuart Medical Center                                      | Hopkinsville    | Kentucky |
| Baptist Health Lexington                                          | Lexington       | Kentucky |
| Kentucky Children's Hospital                                      | Lexington       | Kentucky |
| Women's Hospital at St. Joseph East, The                          | Lexington       | Kentucky |
| Baptist Health Louisville                                         | Louisville      | Kentucky |

**SUPPLEMENTAL TABLE 6** Continued

| Hospital Name                                     | City          | State         |
|---------------------------------------------------|---------------|---------------|
| Norton Children's Hospital                        | Louisville    | Kentucky      |
| Norton Women's and Children's Hospital            | Louisville    | Kentucky      |
| University of Louisville Hospital                 | Louisville    | Kentucky      |
| Baptist Health Deaconess Madisonville             | Madisonville  | Kentucky      |
| Owensboro Health Regional Hospital                | Owensboro     | Kentucky      |
| Baptist Health Paducah                            | Paducah       | Kentucky      |
| Pikeville Medical Center                          | Pikeville     | Kentucky      |
| Christus St. Frances Cabrini Hospital             | Alexandria    | Louisiana     |
| Rapides Women's and Children's Hospital           | Alexandria    | Louisiana     |
| Baton Rouge General Medical Center - Bluebonnet   | Baton Rouge   | Louisiana     |
| Earl K. Long Medical Center                       | Baton Rouge   | Louisiana     |
| Ochsner Medical Center Baton Rouge                | Baton Rouge   | Louisiana     |
| Woman's Hospital                                  | Baton Rouge   | Louisiana     |
| Lakeview Regional Medical Center                  | Covington     | Louisiana     |
| St. Tammany Parish Hospital                       | Covington     | Louisiana     |
| Ochsner Medical Center WestBank                   | Gretna        | Louisiana     |
| North Oaks Medical Center                         | Hammond       | Louisiana     |
| Terrebonne General Medical Center                 | Houma         | Louisiana     |
| Lafayette General Medical Center                  | Lafayette     | Louisiana     |
| Our Lady of Lourdes Women's & Children's Hospital | Lafayette     | Louisiana     |
| Christus Lake Area Hospital                       | Lake Charles  | Louisiana     |
| Lake Charles Memorial Hospital for Women          | Lake Charles  | Louisiana     |
| West Jefferson Medical Center                     | Marrero       | Louisiana     |
| East Jefferson General Hospital                   | Metairie      | Louisiana     |
| Tulane Lakeside Hospital                          | Metairie      | Louisiana     |
| St. Francis Medical Center                        | Monroe        | Louisiana     |
| Children's Hospital of New Orleans                | New Orleans   | Louisiana     |
| Medical Center of Louisiana at New Orleans        | New Orleans   | Louisiana     |
| Ochsner Baptist Medical Center                    | New Orleans   | Louisiana     |
| Ochsner Medical Center - Jefferson Hwy            | New Orleans   | Louisiana     |
| Touro Infirmary                                   | New Orleans   | Louisiana     |
| CHRISTUS Highland                                 | Shreveport    | Louisiana     |
| Ochsner LSU Health St. Mary Medical Center        | Shreveport    | Louisiana     |
| Willis Knighton South                             | Shreveport    | Louisiana     |
| Slidell Memorial Hospital                         | Slidell       | Louisiana     |
| Eastern Maine Medical Center                      | Bangor        | Maine         |
| Barbara Bush Children's at Maine Medical          | Portland      | Maine         |
| Anne Arundel Medical Center                       | Annapolis     | Maryland      |
| Ascension Saint Agnes Hospital                    | Baltimore     | Maryland      |
| Franklin Square Hospital Center                   | Baltimore     | Maryland      |
| Greater Baltimore Medical Center                  | Baltimore     | Maryland      |
| Johns Hopkins Bayview Medical Center              | Baltimore     | Maryland      |
| Johns Hopkins Hospital                            | Baltimore     | Maryland      |
| Mercy Medical Center - Baltimore                  | Baltimore     | Maryland      |
| Sinai Hospital of Baltimore                       | Baltimore     | Maryland      |
| University of Maryland Medical Center             | Baltimore     | Maryland      |
| Walter Reed National Military Medical Center NICU | Bethesda      | Maryland      |
| University of Maryland Capital Region Medical     | Cheverly      | Maryland      |
| Howard County General Hospital                    | Columbia      | Maryland      |
| Frederick Memorial Hospital                       | Frederick     | Maryland      |
| Shady Grove Adventist Hospital                    | Rockville     | Maryland      |
| Peninsula Regional Medical Center                 | Salisbury     | Maryland      |
| Holy Cross Hospital                               | Silver Spring | Maryland      |
| University of Maryland St. Joseph Medical Center  | Towson        | Maryland      |
| Beth Israel Deaconess Medical Center              | Boston        | Massachusetts |
| Boston Medical Center                             | Boston        | Massachusetts |
| Brigham and Women's Hospital                      | Boston        | Massachusetts |
| Massachusetts General Hospital for Children       | Boston        | Massachusetts |
| Tufts Medical Center                              | Boston        | Massachusetts |
| Steward St. Elizabeth's Medical Center            | Brighton      | Massachusetts |

**SUPPLEMENTAL TABLE 6** Continued

| Hospital Name                                                | City           | State         |
|--------------------------------------------------------------|----------------|---------------|
| South Shore Hospital                                         | South Weymouth | Massachusetts |
| Baystate Medical Center                                      | Springfield    | Massachusetts |
| UMass Memorial Healthcare                                    | Worcester      | Massachusetts |
| St. Joseph Mercy Hospital                                    | Ann Arbor      | Michigan      |
| U. of MI, C.S. Mott Children's, Brandon NICU                 | Ann Arbor      | Michigan      |
| Beaumont Hospital - Dearborn                                 | Dearborn       | Michigan      |
| Ascension St. John Hospital                                  | Detroit        | Michigan      |
| Children's Hospital of Michigan                              | Detroit        | Michigan      |
| Detroit Medical Center Sinai-Grace Hospital                  | Detroit        | Michigan      |
| Henry Ford Hospital                                          | Detroit        | Michigan      |
| Hutzel Women's Hospital                                      | Detroit        | Michigan      |
| St. John Detroit Riverview Hospital                          | Detroit        | Michigan      |
| Hurley Medical Center                                        | Flint          | Michigan      |
| Helen DeVos Children's Hospital                              | Grand Rapids   | Michigan      |
| Mercy Health Saint Mary's                                    | Grand Rapids   | Michigan      |
| Henry Ford Allegiance Health                                 | Jackson        | Michigan      |
| Children's Hospital at Bronson                               | Kalamazoo      | Michigan      |
| Sparrow Hospital                                             | Lansing        | Michigan      |
| UPHS-Marquette                                               | Marquette      | Michigan      |
| St. Joseph Mercy Oakland                                     | Pontiac        | Michigan      |
| William Beaumont Hospital                                    | Royal Oak      | Michigan      |
| Covenant Healthcare                                          | Saginaw        | Michigan      |
| Ascension Providence Hospital Southfield Campus              | Southfield     | Michigan      |
| Munson Medical Center                                        | Traverse City  | Michigan      |
| Essentia Health - St. Mary's Children's Hospital             | Duluth         | Minnesota     |
| Maple Grove Hospital                                         | Maple Grove    | Minnesota     |
| Children's Minnesota - Minneapolis                           | Minneapolis    | Minnesota     |
| Hennepin County Medical Center                               | Minneapolis    | Minnesota     |
| University of Minnesota Masonic Children's Hospital          | Minneapolis    | Minnesota     |
| North Memorial Medical Center                                | Robbinsdale    | Minnesota     |
| Mayo Foundation                                              | Rochester      | Minnesota     |
| St. Cloud Hospital                                           | Saint Cloud    | Minnesota     |
| Children's Minnesota-St. Paul                                | Saint Paul     | Minnesota     |
| Merit Health River Oaks                                      | Flowood        | Mississippi   |
| Merit Health Woman's Hospital                                | Flowood        | Mississippi   |
| Delta Regional Medical Center                                | Greenville     | Mississippi   |
| Memorial Hospital at Gulfport                                | Gulfport       | Mississippi   |
| Forrest General Hospital                                     | Hattiesburg    | Mississippi   |
| Merit Health Wesley                                          | Hattiesburg    | Mississippi   |
| Children's Hospital at University of Mississippi Health Care | Jackson        | Mississippi   |
| Merit Health Central                                         | Jackson        | Mississippi   |
| Mississippi Baptist Health Systems                           | Jackson        | Mississippi   |
| St. Dominic, Jackson Memorial Hospital                       | Jackson        | Mississippi   |
| Anderson Regional Medical Center                             | Meridian       | Mississippi   |
| Rush Foundation Hospital                                     | Meridian       | Mississippi   |
| North Mississippi Medical Center                             | Tupelo         | Mississippi   |
| Southeast HEALTH                                             | Cape Girardeau | Missouri      |
| St. Francis Medical Center                                   | Cape Girardeau | Missouri      |
| Women's & Children's Hospital, University of Missouri        | Columbia       | Missouri      |
| Centerpoint Medical Center                                   | Independence   | Missouri      |
| Freeman Hospital and Health System                           | Joplin         | Missouri      |
| Mercy Hospital Joplin                                        | Joplin         | Missouri      |
| Children's Mercy Kansas City                                 | Kansas City    | Missouri      |
| Research Medical Center                                      | Kansas City    | Missouri      |
| St. Luke's Hospital                                          | Kansas City    | Missouri      |
| Truman Medical Center                                        | Kansas City    | Missouri      |
| Mercy Children's Hospital, St. Louis                         | Saint Louis    | Missouri      |
| SSM Health Cardinal Glennon Children's Hospital              | Saint Louis    | Missouri      |
| St. Louis Children's Hospital                                | Saint Louis    | Missouri      |
| Cox Health - Neonatology                                     | Springfield    | Missouri      |



**SUPPLEMENTAL TABLE 6** Continued

| Hospital Name                                        | City          | State         |
|------------------------------------------------------|---------------|---------------|
| Mercy Kids Springfield                               | Springfield   | Missouri      |
| Billings Clinic                                      | Billings      | Montana       |
| St. Vincent Hospital & Health Center                 | Billings      | Montana       |
| Benefis Healthcare                                   | Great Falls   | Montana       |
| Kalispell Regional Medical Center                    | Kalispell     | Montana       |
| Community Medical Center                             | Missoula      | Montana       |
| Good Samaritan Hospital Kearney                      | Kearney       | Nebraska      |
| Bryan Medical Center                                 | Lincoln       | Nebraska      |
| CHI Health St. Elizabeth                             | Lincoln       | Nebraska      |
| CHI Health Bergan Mercy Medical Center               | Omaha         | Nebraska      |
| Children's Hospital and Medical Center               | Omaha         | Nebraska      |
| Creighton University Medical Center                  | Omaha         | Nebraska      |
| Methodist Women's Hospital                           | Omaha         | Nebraska      |
| Nebraska Medical Center                              | Omaha         | Nebraska      |
| St. Rose Dominican Hospital Siena Campus             | Henderson     | Nevada        |
| Children's Hospital of Nevada at UMC                 | Las Vegas     | Nevada        |
| MountainView Hospital                                | Las Vegas     | Nevada        |
| Sunrise Hospital and Medical Center                  | Las Vegas     | Nevada        |
| Dartmouth Hitchcock Medical Center                   | Lebanon       | New Hampshire |
| Elliot Hospital                                      | Manchester    | New Hampshire |
| Children's at Cooper University Medical Center       | Camden        | New Jersey    |
| Our Lady of Lourdes Medical Center                   | Camden        | New Jersey    |
| JFK Medical Center                                   | Edison        | New Jersey    |
| Englewood Hospital and Medical Center                | Englewood     | New Jersey    |
| CentraState Medical Center                           | Freehold      | New Jersey    |
| Hackensack University Medical Center                 | Hackensack    | New Jersey    |
| RWJUH Hamilton                                       | Hamilton      | New Jersey    |
| Jersey City Medical Center                           | Jersey City   | New Jersey    |
| Monmouth Medical Center Southern Campus              | Lakewood      | New Jersey    |
| Saint Barnabas Medical Center                        | Livingston    | New Jersey    |
| Monmouth Medical Center                              | Long Branch   | New Jersey    |
| Mountainside Hospital                                | Montclair     | New Jersey    |
| Goryeb Children's Hospital                           | Morristown    | New Jersey    |
| Jersey Shore University Medical Center               | Neptune       | New Jersey    |
| Robert Wood Johnson University Hospital              | New Brunswick | New Jersey    |
| St. Peter's Medical Center                           | New Brunswick | New Jersey    |
| Children's Hospital of New Jersey at NBIMC           | Newark        | New Jersey    |
| University Hospital Rutgers-NJMS                     | Newark        | New Jersey    |
| St. Joseph Hospital and Medical Center               | Paterson      | New Jersey    |
| Capital Health Medical Center-Hopewell               | Pennington    | New Jersey    |
| Penn Medicine Princeton Medical Center               | Plainsboro    | New Jersey    |
| Atlanticare Regional Medical Center - NICU           | Pomona        | New Jersey    |
| Shore Medical Center                                 | Somers Point  | New Jersey    |
| Overlook Medical Center                              | Summit        | New Jersey    |
| Community Medical Center Toms River                  | Toms River    | New Jersey    |
| Inspira Health Network                               | Vineland      | New Jersey    |
| Virtua Hospital Systems                              | Voorhees      | New Jersey    |
| Hackensack University Medical Center, Pascack Valley | Westwood      | New Jersey    |
| Children's Medical Center at Presbyterian Hospital   | Albuquerque   | New Mexico    |
| Lovelace Women's Hospital                            | Albuquerque   | New Mexico    |
| University of New Mexico Health Sciences Center      | Albuquerque   | New Mexico    |
| Albany Medical Center                                | Albany        | New York      |
| St. Peter's Hospital                                 | Albany        | New York      |
| Montefiore Medical Center-Wakefield Division         | Bronx         | New York      |
| NYC Health + Hospitals - Jacobi Medical Center       | Bronx         | New York      |
| Weiler Hospital Montefiore                           | Bronx         | New York      |
| Brookdale Hospital Medical Center                    | Brooklyn      | New York      |
| Brooklyn Hospital Center, The                        | Brooklyn      | New York      |
| Maimonides Medical Center                            | Brooklyn      | New York      |
| NYC Health + Hospitals - Kings County                | Brooklyn      | New York      |

**SUPPLEMENTAL TABLE 6** Continued

| Hospital Name                                                | City          | State          |
|--------------------------------------------------------------|---------------|----------------|
| NYU Langone Hospital-Brooklyn                                | Brooklyn      | New York       |
| NYU Lutheran Medical Center                                  | Brooklyn      | New York       |
| University Hospital of Brooklyn                              | Brooklyn      | New York       |
| Woodhull Medical Center                                      | Brooklyn      | New York       |
| Sisters of Charity Hospital                                  | Buffalo       | New York       |
| NYC Health + Hospitals - Elmhurst                            | Elmhurst      | New York       |
| Arnot Ogden Medical Center                                   | Elmira        | New York       |
| NYC Health + Hospitals - Queens Hospital Center              | Jamaica       | New York       |
| North Shore University Hospital                              | Manhasset     | New York       |
| Orange Regional Medical Center                               | Middletown    | New York       |
| NYU Winthrop                                                 | Mineola       | New York       |
| Northern Westchester Hospital                                | Mount Kisco   | New York       |
| Cohen Children's Medical Center of New York                  | New Hyde Park | New York       |
| Columbia University Medical Center                           | New York      | New York       |
| Lenox Hill Hospital                                          | New York      | New York       |
| Mt. Sinai Kravis Children's Hospital, The                    | New York      | New York       |
| NYC Health + Hospitals - Bellevue                            | New York      | New York       |
| NYC Health + Hospitals - Harlem Hospital Center              | New York      | New York       |
| St. Vincent Hospital and Medical Center                      | New York      | New York       |
| Tisch Hospital, NYU Medical Center                           | New York      | New York       |
| Weill Cornell Medical Center                                 | New York      | New York       |
| Vassar Brothers Hospital                                     | Poughkeepsie  | New York       |
| Golisano Children's Hospital at Strong                       | Rochester     | New York       |
| Richmond University Medical Center                           | Staten Island | New York       |
| Staten Island University Hospital                            | Staten Island | New York       |
| Stony Brook University Medical Center                        | Stony Brook   | New York       |
| Crouse Health Baker Regional NICU                            | Syracuse      | New York       |
| St. Joseph's Health Center                                   | Syracuse      | New York       |
| Good Samaritan Hospital Medical Center                       | West Islip    | New York       |
| Mission Children's Hospital                                  | Asheville     | North Carolina |
| North Carolina Children's Hospital                           | Chapel Hill   | North Carolina |
| Carolinas Medical Center                                     | Charlotte     | North Carolina |
| Novant Health Presbyterian Medical Center                    | Charlotte     | North Carolina |
| Jeff Gordon Children's Hospital at CMC                       | Concord       | North Carolina |
| Duke University                                              | Durham        | North Carolina |
| Cape Fear Valley Medical Center                              | Fayetteville  | North Carolina |
| CaroMont Regional Medical Center                             | Gastonia      | North Carolina |
| Cone Health Women & Children's Center at Moses Cone Hospital | Greensboro    | North Carolina |
| Vidant Medical Center                                        | Greenville    | North Carolina |
| Catawba Valley Medical Center                                | Hickory       | North Carolina |
| Frye Regional Medical Center                                 | Hickory       | North Carolina |
| Onslow Memorial Hospital                                     | Jacksonville  | North Carolina |
| FirstHealth Moore Regional Hospital                          | Pinehurst     | North Carolina |
| Rex Hospital                                                 | Raleigh       | North Carolina |
| WakeMedical Center                                           | Raleigh       | North Carolina |
| Novant Health New Hanover Regional Medical Center            | Wilmington    | North Carolina |
| Brenner Children's Hospital at WFUBMC                        | Winston-Salem | North Carolina |
| Forsyth Memorial Hospital                                    | Winston-Salem | North Carolina |
| Sanford Bismarck Medical Center                              | Bismarck      | North Dakota   |
| Essentia Health                                              | Fargo         | North Dakota   |
| Sanford Medical Center Fargo                                 | Fargo         | North Dakota   |
| Altru Health System                                          | Grand Forks   | North Dakota   |
| Trinity Hospital                                             | Minot         | North Dakota   |
| Akron Children's Hospital                                    | Akron         | Ohio           |
| Akron Children's Special Care Nursery at Summa               | Akron         | Ohio           |
| Akron Children's NICU at St. Elizabeth - Boardman            | Boardman      | Ohio           |
| Akron Children's NICU at Aultman                             | Canton        | Ohio           |
| Mercy Medical Center                                         | Canton        | Ohio           |
| Children's Hospital Medical Center Cincinnati                | Cincinnati    | Ohio           |
| Good Samaritan Hospital                                      | Cincinnati    | Ohio           |

**SUPPLEMENTAL TABLE 6** Continued

| Hospital Name                                    | City             | State        |
|--------------------------------------------------|------------------|--------------|
| University Hospital, Cincinnati                  | Cincinnati       | Ohio         |
| Cleveland Clinic Foundation, The                 | Cleveland        | Ohio         |
| Fairview Hospital                                | Cleveland        | Ohio         |
| MetroHealth Medical Center                       | Cleveland        | Ohio         |
| Rainbow Babies & Children's Hospital             | Cleveland        | Ohio         |
| Mount Carmel East                                | Columbus         | Ohio         |
| Nationwide Children's Hospital (NCH)             | Columbus         | Ohio         |
| NCH at Doctor's Hospital West                    | Columbus         | Ohio         |
| NCH at Grant Medical Center                      | Columbus         | Ohio         |
| NCH at Riverside Methodist Hospital              | Columbus         | Ohio         |
| NCH Main Campus                                  | Columbus         | Ohio         |
| NCH NICU at Ohio State Medical Center            | Columbus         | Ohio         |
| Dayton Children's Hospital                       | Dayton           | Ohio         |
| Miami Valley Hospital                            | Dayton           | Ohio         |
| Southview Medical Center                         | Dayton           | Ohio         |
| NCH at Dublin Methodist Hospital                 | Dublin           | Ohio         |
| Mount Carmel Grove City                          | Grove City       | Ohio         |
| Kettering Medical Center                         | Kettering        | Ohio         |
| St. Rita's Medical Center                        | Lima             | Ohio         |
| CCF Children's - Hillcrest NICU                  | Mayfield Heights | Ohio         |
| Mercy Children's Hospital                        | Toledo           | Ohio         |
| Russell J. Ebeid Children's Hospital             | Toledo           | Ohio         |
| NCH NICU at Mount Carmel St. Ann's Hospital      | Westerville      | Ohio         |
| Northside Regional Medical Center                | Youngstown       | Ohio         |
| Mercy Health Center                              | Oklahoma City    | Oklahoma     |
| Mercy Hospital, Oklahoma City                    | Oklahoma City    | Oklahoma     |
| Oklahoma University Health Sciences Center       | Oklahoma City    | Oklahoma     |
| Ascension St John Medical Center                 | Tulsa            | Oklahoma     |
| Henry Zarrow Neonatal Intensive Care Unit        | Tulsa            | Oklahoma     |
| Oklahoma State University Medical Center         | Tulsa            | Oklahoma     |
| Peggy V. Helmerich Women's Center                | Tulsa            | Oklahoma     |
| St. Charles Health Care                          | Bend             | Oregon       |
| Kaiser Sunnyside Medical Center                  | Clackamas        | Oregon       |
| Rogue Regional Medical Center                    | Medford          | Oregon       |
| Oregon Health and Science University             | Portland         | Oregon       |
| Providence Portland Medical Center               | Portland         | Oregon       |
| Providence St. Vincent Medical Center            | Portland         | Oregon       |
| Randall Children's Hospital at Legacy Emanuel    | Portland         | Oregon       |
| Salem Hospital                                   | Salem            | Oregon       |
| PeaceHealth Riverbend                            | Springfield      | Oregon       |
| Abington Memorial Hospital                       | Abington         | Pennsylvania |
| Lehigh Valley Health Network                     | Allentown        | Pennsylvania |
| St. Luke's Allentown Campus                      | Allentown        | Pennsylvania |
| St. Luke's University Hospital                   | Bethlehem        | Pennsylvania |
| Bryn Mawr Hospital                               | Bryn Mawr        | Pennsylvania |
| Holy Spirit Hospital                             | Camp Hill        | Pennsylvania |
| Geisinger Medical Center                         | Danville         | Pennsylvania |
| Doylestown Hospital                              | Doylestown       | Pennsylvania |
| Penn Highlands DuBois                            | DuBois           | Pennsylvania |
| Einstein Medical Center Montgomery               | East Norriton    | Pennsylvania |
| St. Luke's Hospital - Anderson Campus            | Easton           | Pennsylvania |
| Ephrata Community Hospital                       | Ephrata          | Pennsylvania |
| Hamot Medical Center                             | Erie             | Pennsylvania |
| St. Vincent Health Center                        | Erie             | Pennsylvania |
| Pinnacle Health Hospitals                        | Harrisburg       | Pennsylvania |
| Penn State Children's Hospital                   | Hershey          | Pennsylvania |
| Conemaugh Memorial Medical Center                | Johnstown        | Pennsylvania |
| Lancaster General Health-Women & Babies Hospital | Lancaster        | Pennsylvania |
| St. Mary Medical Center                          | Langhorne        | Pennsylvania |
| Holy Redeemer Hospital and Medical Center        | Meadowbrook      | Pennsylvania |

**SUPPLEMENTAL TABLE 6** Continued

| Hospital Name                                                       | City         | State          |
|---------------------------------------------------------------------|--------------|----------------|
| Riddle Hospital                                                     | Media        | Pennsylvania   |
| Children's Hospital of Philadelphia Newborn Center                  | Philadelphia | Pennsylvania   |
| Einstein Medical Center Philadelphia                                | Philadelphia | Pennsylvania   |
| Hahnemann University Hospital                                       | Philadelphia | Pennsylvania   |
| Hospital of the University of Pennsylvania                          | Philadelphia | Pennsylvania   |
| Pennsylvania Hospital                                               | Philadelphia | Pennsylvania   |
| Temple University Hospital                                          | Philadelphia | Pennsylvania   |
| Thomas Jefferson University Hospital                                | Philadelphia | Pennsylvania   |
| Allegheny General Hospital                                          | Pittsburgh   | Pennsylvania   |
| Magee-Women's Hospital of University of Pennsylvania Medical Center | Pittsburgh   | Pennsylvania   |
| Western Pennsylvania Hospital                                       | Pittsburgh   | Pennsylvania   |
| Reading Hospital-Tower Health                                       | Reading      | Pennsylvania   |
| Moses Taylor Hospital                                               | Scranton     | Pennsylvania   |
| Crozer Chester Medical Center                                       | Upland       | Pennsylvania   |
| CHOP Newborn Care at Chester County Hospital                        | West Chester | Pennsylvania   |
| Geisinger Wyoming Valley Medical Center                             | Wilkes-Barre | Pennsylvania   |
| Lankenau Medical Center                                             | Wynnewood    | Pennsylvania   |
| WellSpan York Hospital                                              | York         | Pennsylvania   |
| Women & Infants Hospital                                            | Providence   | Rhode Island   |
| Shawn Jenkins Children's Hospital                                   | Charleston   | South Carolina |
| Trident Medical Center                                              | Charleston   | South Carolina |
| Palmetto Health Richland                                            | Columbia     | South Carolina |
| Prisma Health Baptist                                               | Columbia     | South Carolina |
| McLeod Regional Medical Center                                      | Florence     | South Carolina |
| Children's Hospital of Greenville                                   | Greenville   | South Carolina |
| St. Francis Eastside                                                | Greenville   | South Carolina |
| Piedmont Medical Center                                             | Rock Hill    | South Carolina |
| Spartanburg Regional Healthcare System                              | Spartanburg  | South Carolina |
| Summerville Medical Center                                          | Summerville  | South Carolina |
| Monument Health Rapid City Hospital                                 | Rapid City   | South Dakota   |
| Avera McKennan                                                      | Sioux Falls  | South Dakota   |
| Boekelheide NICU at Sanford Health                                  | Sioux Falls  | South Dakota   |
| Children's Hospital at Erlanger                                     | Chattanooga  | Tennessee      |
| Parkridge East Hospital                                             | Chattanooga  | Tennessee      |
| Maury Regional Medical Center                                       | Columbia     | Tennessee      |
| TriStar Summit Medical Center                                       | Hermitage    | Tennessee      |
| Jackson Madison County General Hospital                             | Jackson      | Tennessee      |
| Niswonger Children's Hospital                                       | Johnson City | Tennessee      |
| Wellmont Holston Valley Medical Center                              | Kingsport    | Tennessee      |
| East Tennessee Children's Hospital                                  | Knoxville    | Tennessee      |
| St. Mary's Health System Inc.                                       | Knoxville    | Tennessee      |
| University of Tennessee Medical Center                              | Knoxville    | Tennessee      |
| Baptist Memorial Hospital for Women                                 | Memphis      | Tennessee      |
| Le Bonheur Children's Hospital                                      | Memphis      | Tennessee      |
| Regional One Health                                                 | Memphis      | Tennessee      |
| St. Francis Hospital Memphis                                        | Memphis      | Tennessee      |
| Children's Hospital at TriStar Centennial, The                      | Nashville    | Tennessee      |
| Monroe Carell Jr. Children's Hospital Vanderbilt                    | Nashville    | Tennessee      |
| Hendrick Medical Center                                             | Abilene      | Texas          |
| Hendrick Medical Center South                                       | Abilene      | Texas          |
| Baptist St. Anthony's Health System                                 | Amarillo     | Texas          |
| Northwest Texas Healthcare System                                   | Amarillo     | Texas          |
| Medical City Arlington                                              | Arlington    | Texas          |
| Texas Health Arlington Memorial Hospital                            | Arlington    | Texas          |
| Ascension Seton Medical Center Austin                               | Austin       | Texas          |
| Dell Children's Medical Center of Central Texas                     | Austin       | Texas          |
| North Austin Medical Center                                         | Austin       | Texas          |
| St. David's Medical Center                                          | Austin       | Texas          |
| St. David's South Austin Medical Center                             | Austin       | Texas          |
| CHRISTUS Southeast Texas Hospital                                   | Beaumont     | Texas          |

**SUPPLEMENTAL TABLE 6** Continued

| Hospital Name                                          | City           | State |
|--------------------------------------------------------|----------------|-------|
| Valley Baptist Medical Center - Brownsville            | Brownsville    | Texas |
| Valley Regional Medical Center Texas                   | Brownsville    | Texas |
| HCA Houston Healthcare Conroe                          | Conroe         | Texas |
| Christus Spohn Hospital Corpus Christi South           | Corpus Christi | Texas |
| Corpus Christi Medical Center                          | Corpus Christi | Texas |
| Driscoll Children's Hospital                           | Corpus Christi | Texas |
| Memorial Hermann Cypress Hospital                      | Cypress        | Texas |
| Baylor Healthcare System                               | Dallas         | Texas |
| Medical City Dallas                                    | Dallas         | Texas |
| Methodist Dallas Medical Center                        | Dallas         | Texas |
| Presbyterian Hospital of Dallas                        | Dallas         | Texas |
| Texas Health Presbyterian Hospital Dallas              | Dallas         | Texas |
| University of Texas Southwestern Medical Center Dallas | Dallas         | Texas |
| William P. Clements Jr. University Hospital            | Dallas         | Texas |
| Texas Health Presbyterian Hospital Denton              | Denton         | Texas |
| Women's Hospital at Renaissance                        | Edinburg       | Texas |
| Del Sol Medical Center                                 | El Paso        | Texas |
| El Paso Children's Hospital                            | El Paso        | Texas |
| Las Palmas Medical Center                              | El Paso        | Texas |
| University Medical Center of El Paso                   | El Paso        | Texas |
| Texas Health Presbyterian Hospital Flower Mound        | Flower Mound   | Texas |
| Baylor All Saints Medical Center                       | Fort Worth     | Texas |
| Cook Children's Medical Center                         | Fort Worth     | Texas |
| Harris Methodist Fort Worth Hospital                   | Fort Worth     | Texas |
| John Peter Smith Hospital                              | Fort Worth     | Texas |
| Medical City Alliance                                  | Fort Worth     | Texas |
| Medical City Frisco                                    | Frisco         | Texas |
| University of Texas Medical Branch                     | Galveston      | Texas |
| Valley Baptist Medical Center - Harlingen              | Harlingen      | Texas |
| Ben Taub General Hospital                              | Houston        | Texas |
| Children's Memorial Hermann Hospital                   | Houston        | Texas |
| HCA Houston Healthcare Cypress Fairbanks               | Houston        | Texas |
| HCA Houston Healthcare Northwest                       | Houston        | Texas |
| Houston Methodist West Hospital                        | Houston        | Texas |
| Lyndon B. Johnson General Hospital                     | Houston        | Texas |
| Memorial Hermann Greater Heights Hospital              | Houston        | Texas |
| Memorial Hermann Memorial City Medical Center          | Houston        | Texas |
| Memorial Hermann Southeast                             | Houston        | Texas |
| Memorial Hermann Southwest                             | Houston        | Texas |
| Methodist Willowbrook Hospital                         | Houston        | Texas |
| St. Joseph Hospital                                    | Houston        | Texas |
| Texas Children's Hospital, Baylor College of Medicine  | Houston        | Texas |
| Woman's Hospital of Texas, The                         | Houston        | Texas |
| Memorial Hermann Northeast Hospital                    | Humble         | Texas |
| Memorial Hermann Katy Hospital                         | Katy           | Texas |
| HCA Houston Healthcare Kingwood                        | Kingwood       | Texas |
| Medical City Lewisville                                | Lewisville     | Texas |
| Christus Good Shepherd Medical Center                  | Longview       | Texas |
| Longview Regional Medical Center                       | Longview       | Texas |
| Covenant Children's Hospital                           | Lubbock        | Texas |
| University Medical Center                              | Lubbock        | Texas |
| Methodist Mansfield Medical Center                     | Mansfield      | Texas |
| Rio Grande Regional Hospital                           | McAllen        | Texas |
| Medical City of McKinney                               | McKinney       | Texas |
| Medical Center Hospital Odessa                         | Odessa         | Texas |
| HCA Houston Healthcare Southeast                       | Pasadena       | Texas |
| Medical City Plano                                     | Plano          | Texas |
| Texas Health Presbyterian Hospital Plano               | Plano          | Texas |
| Methodist Richardson Medical Center                    | Richardson     | Texas |
| Lake Pointe Medical Center                             | Rowlett        | Texas |

**SUPPLEMENTAL TABLE 6** Continued

| Hospital Name                                                  | City            | State      |
|----------------------------------------------------------------|-----------------|------------|
| Children's Hospital of San Antonio                             | San Antonio     | Texas      |
| Methodist Children's Hospital                                  | San Antonio     | Texas      |
| Methodist Stone Oak Hospital (MSOH)                            | San Antonio     | Texas      |
| Metropolitan Methodist Hospital                                | San Antonio     | Texas      |
| North Central Baptist Hospital                                 | San Antonio     | Texas      |
| St. Luke's Baptist Hospital                                    | San Antonio     | Texas      |
| University Hospital San Antonio                                | San Antonio     | Texas      |
| Houston Methodist Sugar Land Hospital                          | Sugar Land      | Texas      |
| Baylor Scott & White McLane Children's Medical Center          | Temple          | Texas      |
| Christus St. Michael Health System                             | Texarkana       | Texas      |
| Houston Methodist, The Woodlands Hospital                      | The Woodlands   | Texas      |
| Memorial Hermann, The Woodlands Hospital                       | The Woodlands   | Texas      |
| St. Luke's, The Woodlands Hospital                             | The Woodlands   | Texas      |
| Texas Children's Hospital, The Woodlands                       | The Woodlands   | Texas      |
| Christus Trinity Mother Frances Health System                  | Tyler           | Texas      |
| DeTar Hospital North                                           | Victoria        | Texas      |
| Baylor Scott & White Medical Center - Hillcrest                | Waco            | Texas      |
| HCA Houston Healthcare Clear Lake                              | Webster         | Texas      |
| Intermountain Medical Center                                   | Murray          | Utah       |
| McKay Dee Hospital Center                                      | Ogden           | Utah       |
| Ogden Regional Medical Center                                  | Ogden           | Utah       |
| Timpanogos Regional Hospital                                   | Orem            | Utah       |
| Utah Valley Regional Medical Center                            | Provo           | Utah       |
| St. George Regional Medical Center                             | Saint George    | Utah       |
| Primary Children's Medical Center                              | Salt Lake City  | Utah       |
| St. Mark's Hospital                                            | Salt Lake City  | Utah       |
| University of Utah Health Sciences Center                      | Salt Lake City  | Utah       |
| University of Vermont Children's Hospital                      | Burlington      | Vermont    |
| Inova Alexandria Hospital (NICU)                               | Alexandria      | Virginia   |
| Virginia Hospital Center                                       | Arlington       | Virginia   |
| University of Virginia                                         | Charlottesville | Virginia   |
| Inova Fair Oaks Hospital                                       | Fairfax         | Virginia   |
| INOVA Children's Hospital                                      | Falls Church    | Virginia   |
| Mary Washington Hospital                                       | Fredericksburg  | Virginia   |
| Spotsylvania Regional Medical Center                           | Fredericksburg  | Virginia   |
| Inova Loudoun Hospital                                         | Leesburg        | Virginia   |
| Centra Health, Virginia Baptist Hospital                       | Lynchburg       | Virginia   |
| Children's Hospital of the King's Daughters                    | Norfolk         | Virginia   |
| Naval Medical Center Portsmouth                                | Portsmouth      | Virginia   |
| Reston Hospital Center                                         | Reston          | Virginia   |
| Bon Secours St. Mary's Hospital                                | Richmond        | Virginia   |
| Children's Hospital of Richmond at VCU                         | Richmond        | Virginia   |
| Chippenham & Johnston-Willis Medical Center, Chippenham Campus | Richmond        | Virginia   |
| Henrico Doctors' Hospital                                      | Richmond        | Virginia   |
| Johnston-Willis Hospital                                       | Richmond        | Virginia   |
| Carilion Clinic Children's Hospital                            | Roanoke         | Virginia   |
| Winchester Medical Center                                      | Winchester      | Virginia   |
| Sentara Northern Virginia Medical Center                       | Woodbridge      | Virginia   |
| Overlake Hospital Medical Center                               | Bellevue        | Washington |
| Providence Regional Medical Center Everett                     | Everett         | Washington |
| Evergreen Health                                               | Kirkland        | Washington |
| University of Washington Medicine - Valley Medical Center      | Renton          | Washington |
| Kadlec Regional Medical Center                                 | Richland        | Washington |
| Swedish Med Cen-First Hill Pavilion                            | Seattle         | Washington |
| University of Washington Medical Center                        | Seattle         | Washington |
| Deaconess Hospital                                             | Spokane         | Washington |
| Providence Sacred Heart Medical Center & Children's Hospital   | Spokane         | Washington |
| MultiCare Health System-Tacoma General Hospital                | Tacoma          | Washington |
| St. Joseph Medical Center                                      | Tacoma          | Washington |
| Legacy Salmon Creek Hospital                                   | Vancouver       | Washington |

**SUPPLEMENTAL TABLE 6** Continued

| Hospital Name                                      | City        | State         |
|----------------------------------------------------|-------------|---------------|
| PeaceHealth Southwest Medical Center               | Vancouver   | Washington    |
| Yakima Valley Memorial Hospital                    | Yakima      | Washington    |
| Charleston Area Medical Center                     | Charleston  | West Virginia |
| Cabell Huntington Hospital, Inc.                   | Huntington  | West Virginia |
| Berkeley Medical Center                            | Martinsburg | West Virginia |
| West Virginia University School of Medicine        | Morgantown  | West Virginia |
| Ascension NE Wisconsin - St Elizabeth Campus       | Appleton    | Wisconsin     |
| Aurora Baycare Medical Center                      | Green Bay   | Wisconsin     |
| St. Vincent Hospital                               | Green Bay   | Wisconsin     |
| Gundersen Lutheran Medical Center                  | La Crosse   | Wisconsin     |
| American Family Children's Hospital                | Madison     | Wisconsin     |
| Meriter Hospital                                   | Madison     | Wisconsin     |
| SSM Health St. Mary's Hospital Madison             | Madison     | Wisconsin     |
| Marshfield Medical Center - Marshfield             | Marshfield  | Wisconsin     |
| Ascension Columbia St. Mary's Hospital Milwaukee   | Milwaukee   | Wisconsin     |
| Ascension SE Wisconsin Hospital - St Joseph Campus | Milwaukee   | Wisconsin     |
| Aurora Sinai Medical Center                        | Milwaukee   | Wisconsin     |
| Children's Hospital of Wisconsin, Fox Valley       | Neenah      | Wisconsin     |
| Ascension All Saints Hospital                      | Racine      | Wisconsin     |
| Waukesha Memorial Hospital                         | Waukesha    | Wisconsin     |
| Aspirus Wausau Hospital                            | Wausau      | Wisconsin     |
| Children's Wisconsin                               | Wauwatosa   | Wisconsin     |
| Aurora Women's Pavilion                            | West Allis  | Wisconsin     |

No./N (%) unless otherwise noted. IQR, interquartile range.

<sup>a</sup> Among infants born before 33 wk. Data missing for 1.1% of eligible infants.

<sup>b</sup> Data missing for 2.2% of readmitted infants.

<sup>c</sup> Data missing for 3.6% of infants.

<sup>d</sup> Data missing for 4.7% of infants. For all other variables, <0.5% missing values.

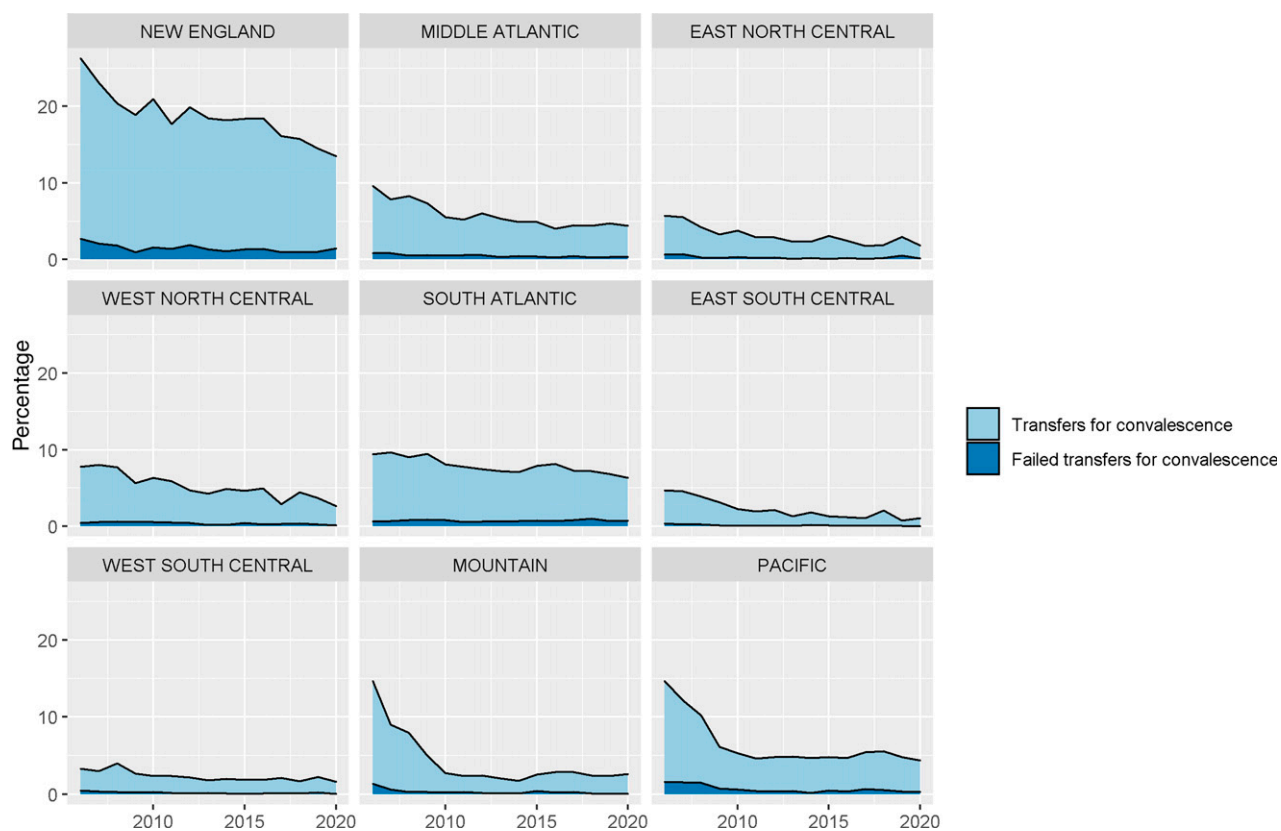

#### SUPPLEMENTAL FIGURE 4

Percentage of transfers for convalescence and failed transfers by region between 2006 and 2020.
